# Supplementary material for: Community Pharmacy Response to Infection Control during COVID-19. A Cross-Sectional Survey.
Source: Preprints.org preprint supplement (doi:10.20944/preprints202005.0338.v1), 2020-05-21

## Gender Demographics

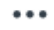

Answered: 137 Skipped: 0

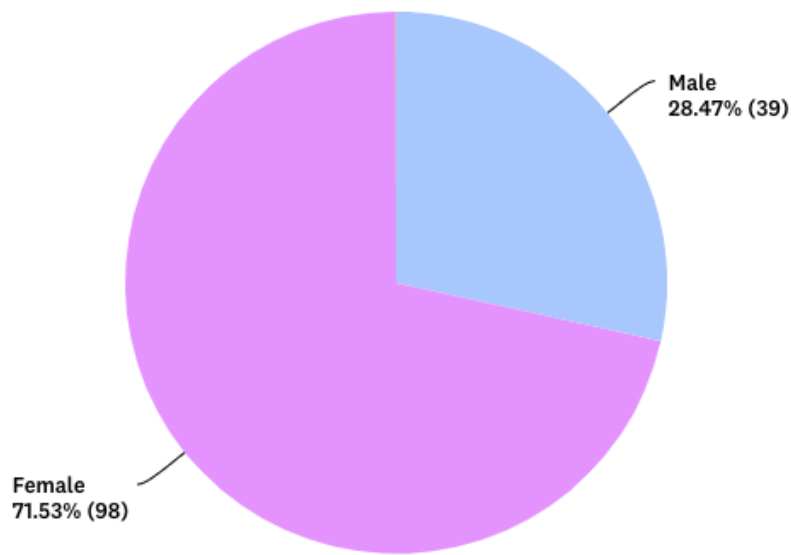

## Age Demographics

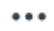

Answered: 137 Skipped: 0

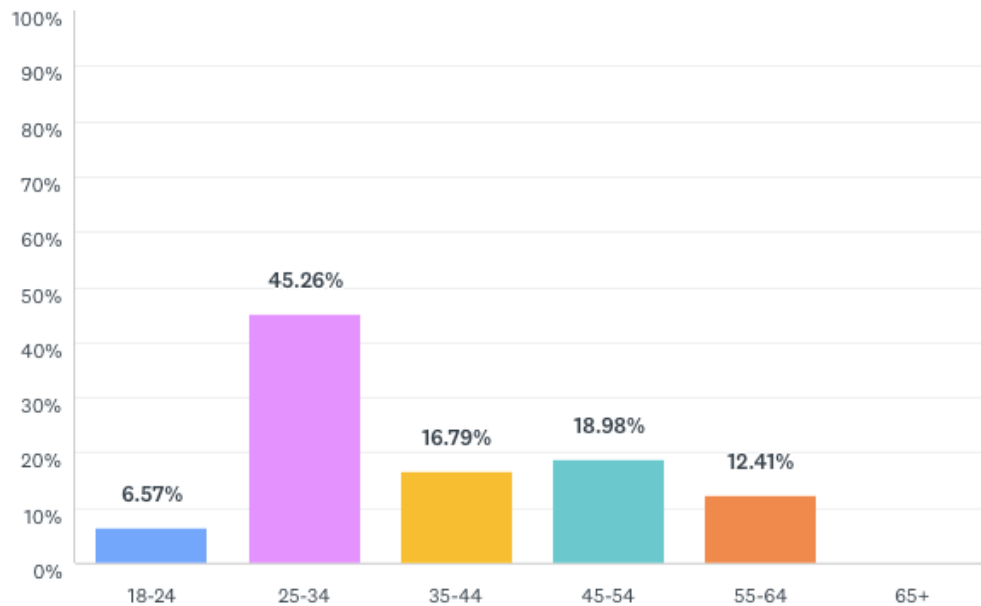

## Primary Place of Pharmacy Practice

...

Answered: 137 Skipped: 0

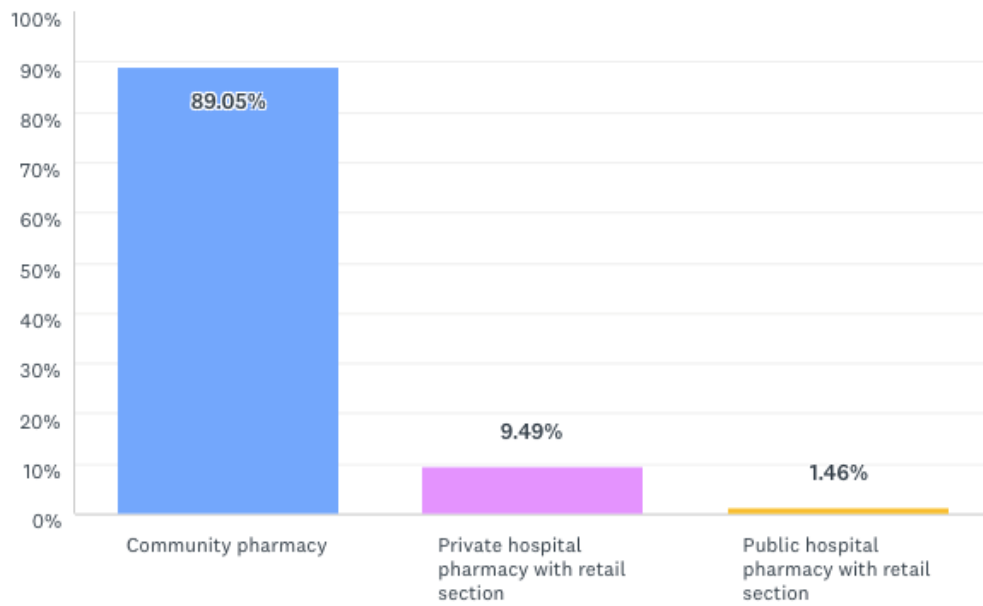

## Pharmacy Groups

...

Answered: 137 Skipped: 0

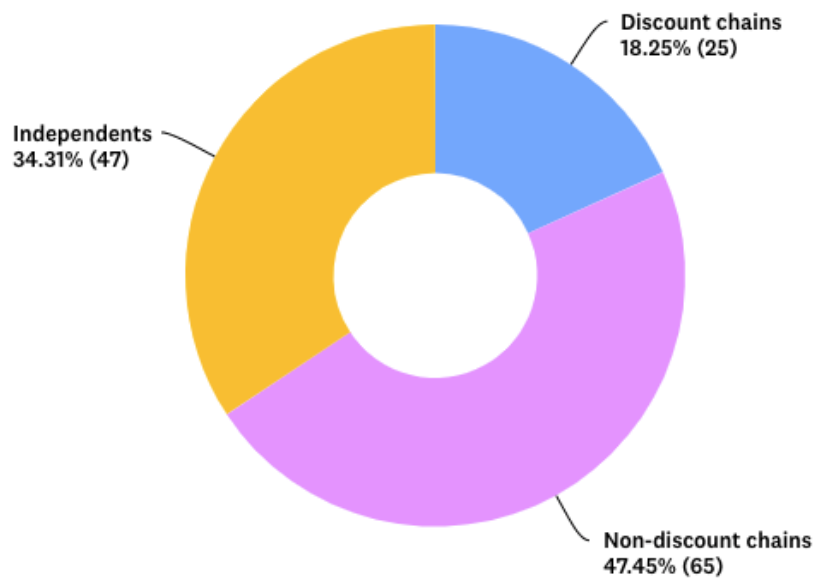

## Role in the Pharmacy

Answered: 137 Skipped: 0

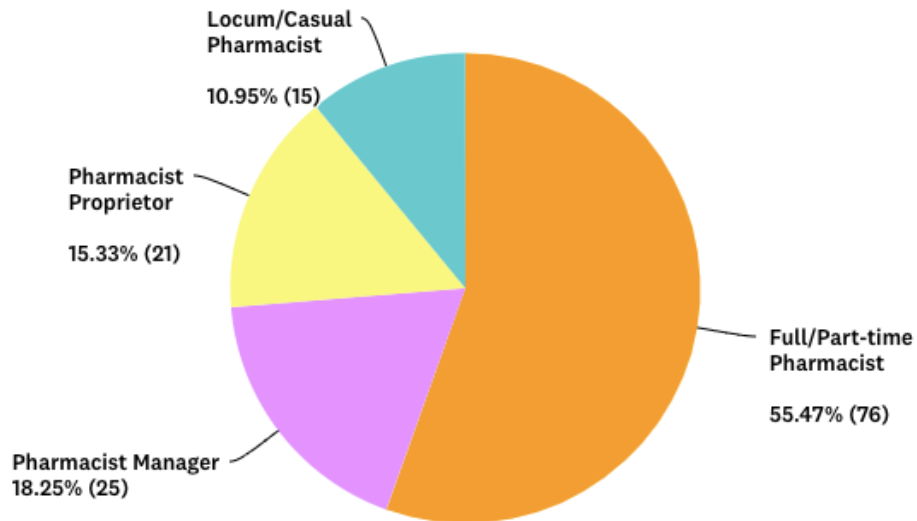

## Pharmacy Staff Safety Precautions

Answered: 137 Skipped: 0

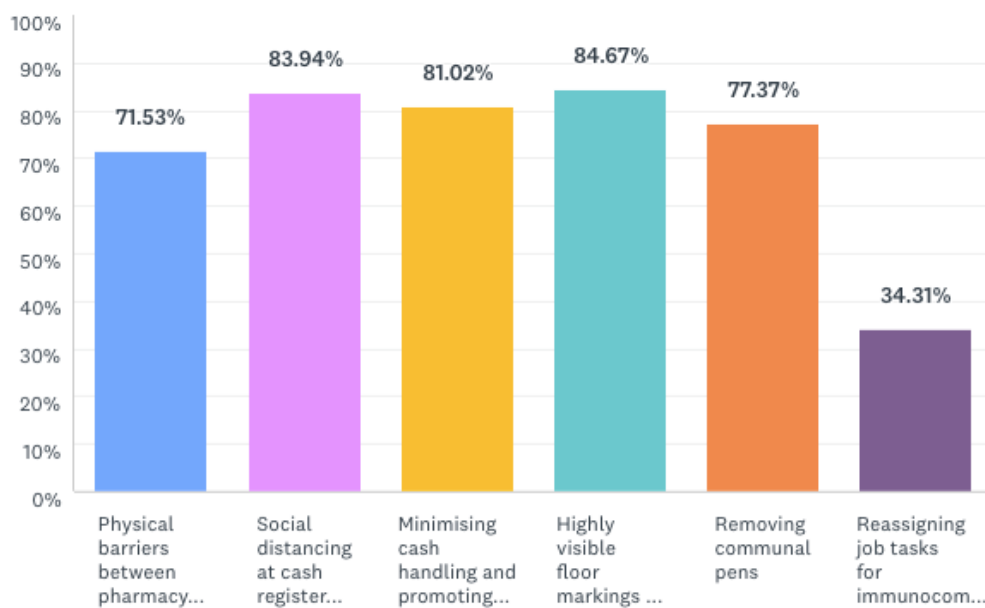

## Premise Cleaning

...

Answered: 137 Skipped: 0

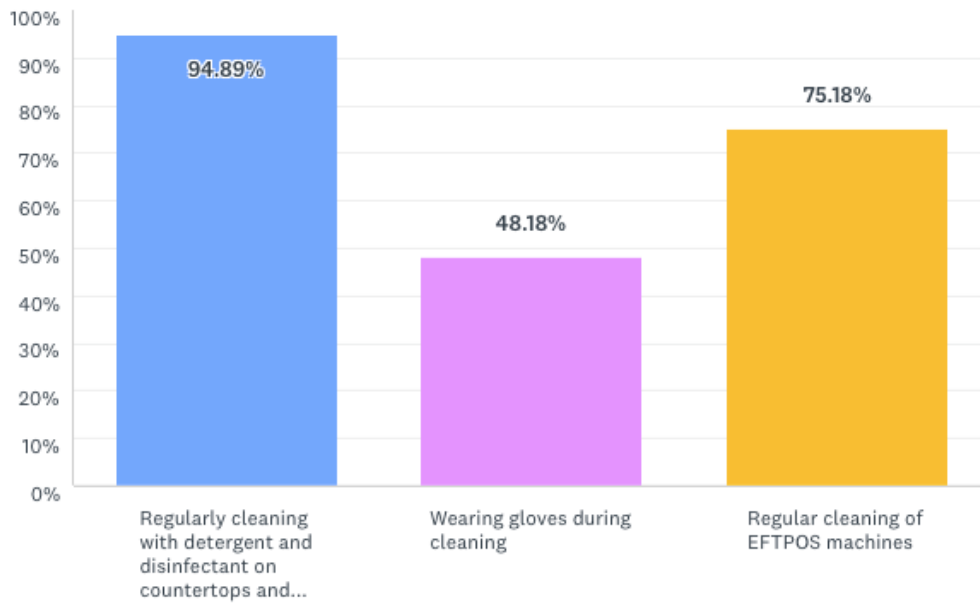

## Cleaning and Disinfecting of Frequently Touched Items in Pharmacy S...

...

Answered: 137 Skipped: 0

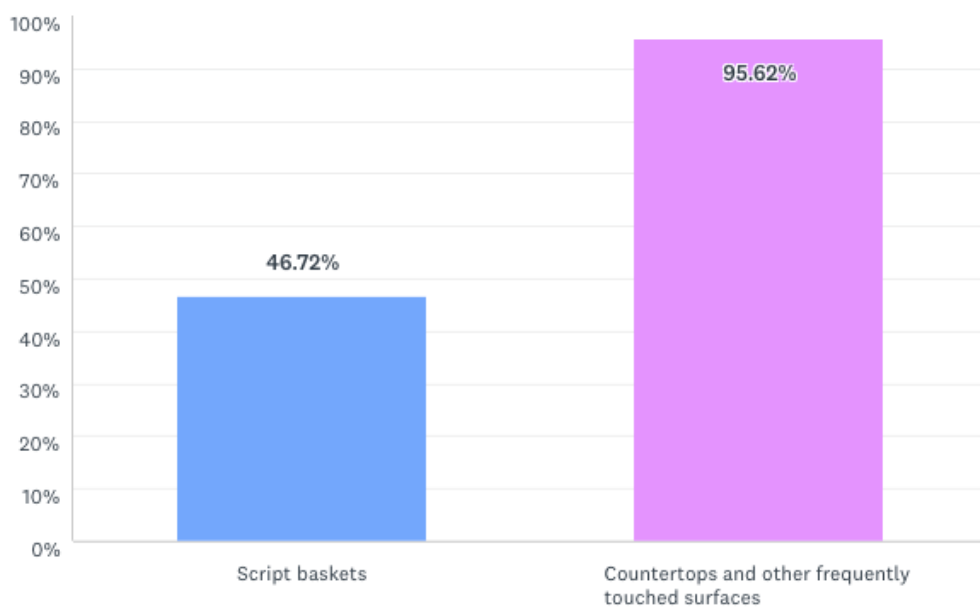

## Awareness of Australian Government 2-step Environmental Cleaning ...

Answered: 137 Skipped: 0

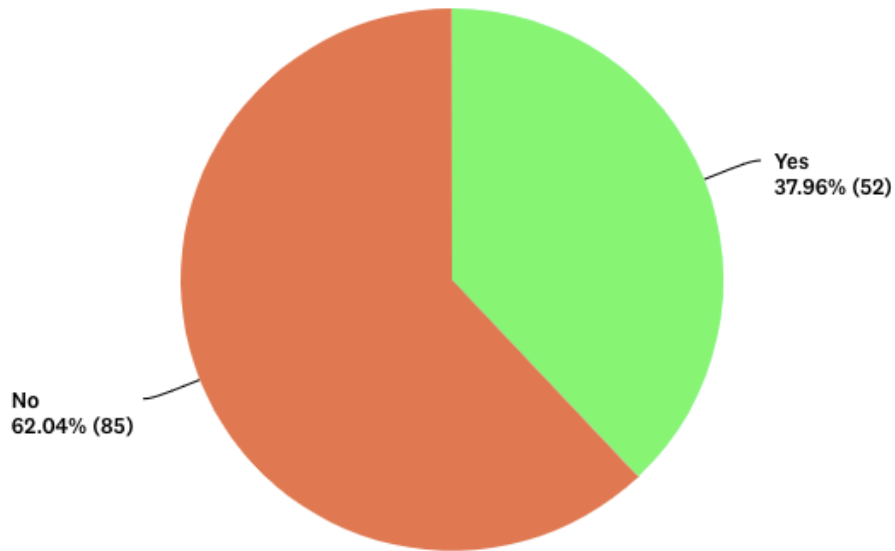

## Current Infection Control Practice

Answered: 137 Skipped: 0

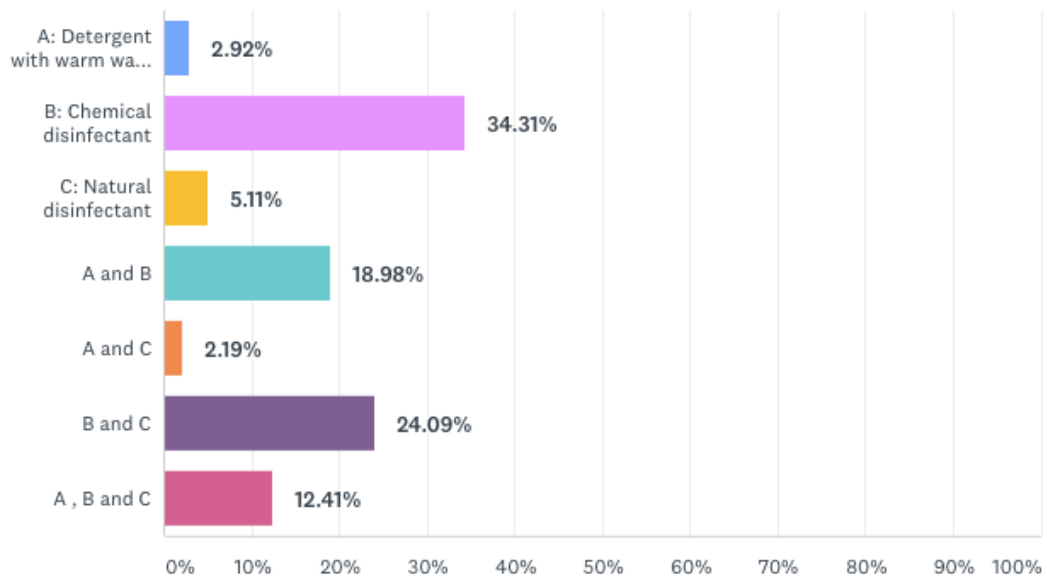

## Medication Counselling and Social/Physical Distancing

...

Answered: 137 Skipped: 0

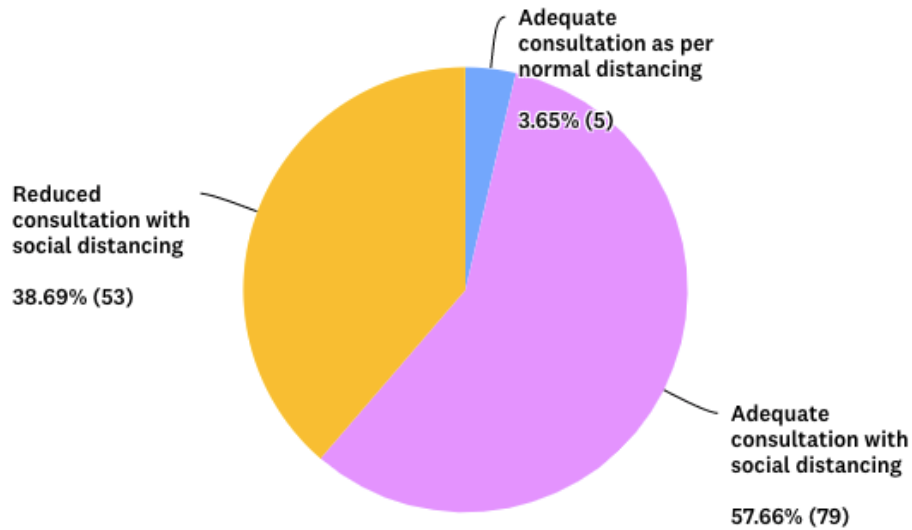

## Ability to Keep Up with Evolving Guidelines Around COVID-19 in the P...

...

Answered: 137 Skipped: 0

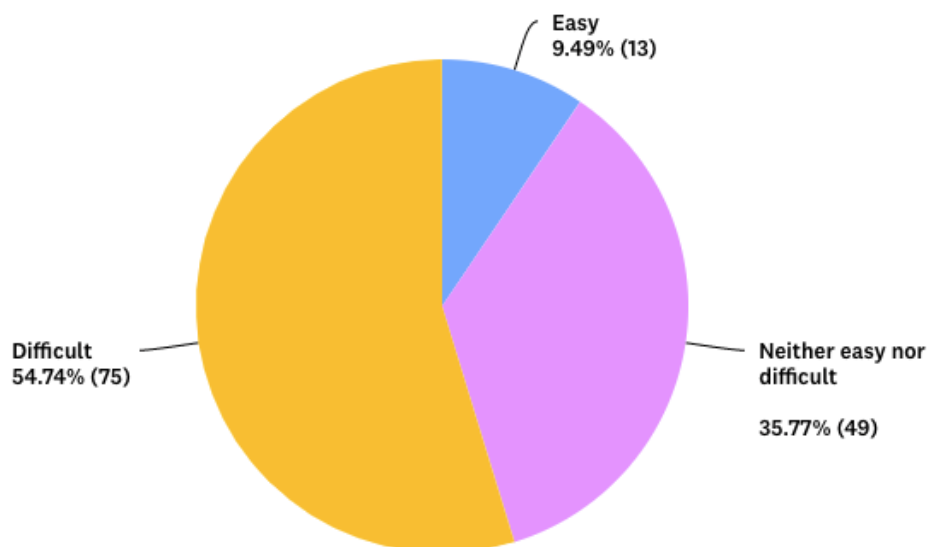

Supplement: Supplementary file 1 [file supplementary]
